# Supplementary material
Source: publisher figshare collection journal article supplement (https://aacr.figshare.com/articles/dataset/_/22432521)
Supplement: Supplementary file 1 [file 39878910]

Supplementary Figure S6

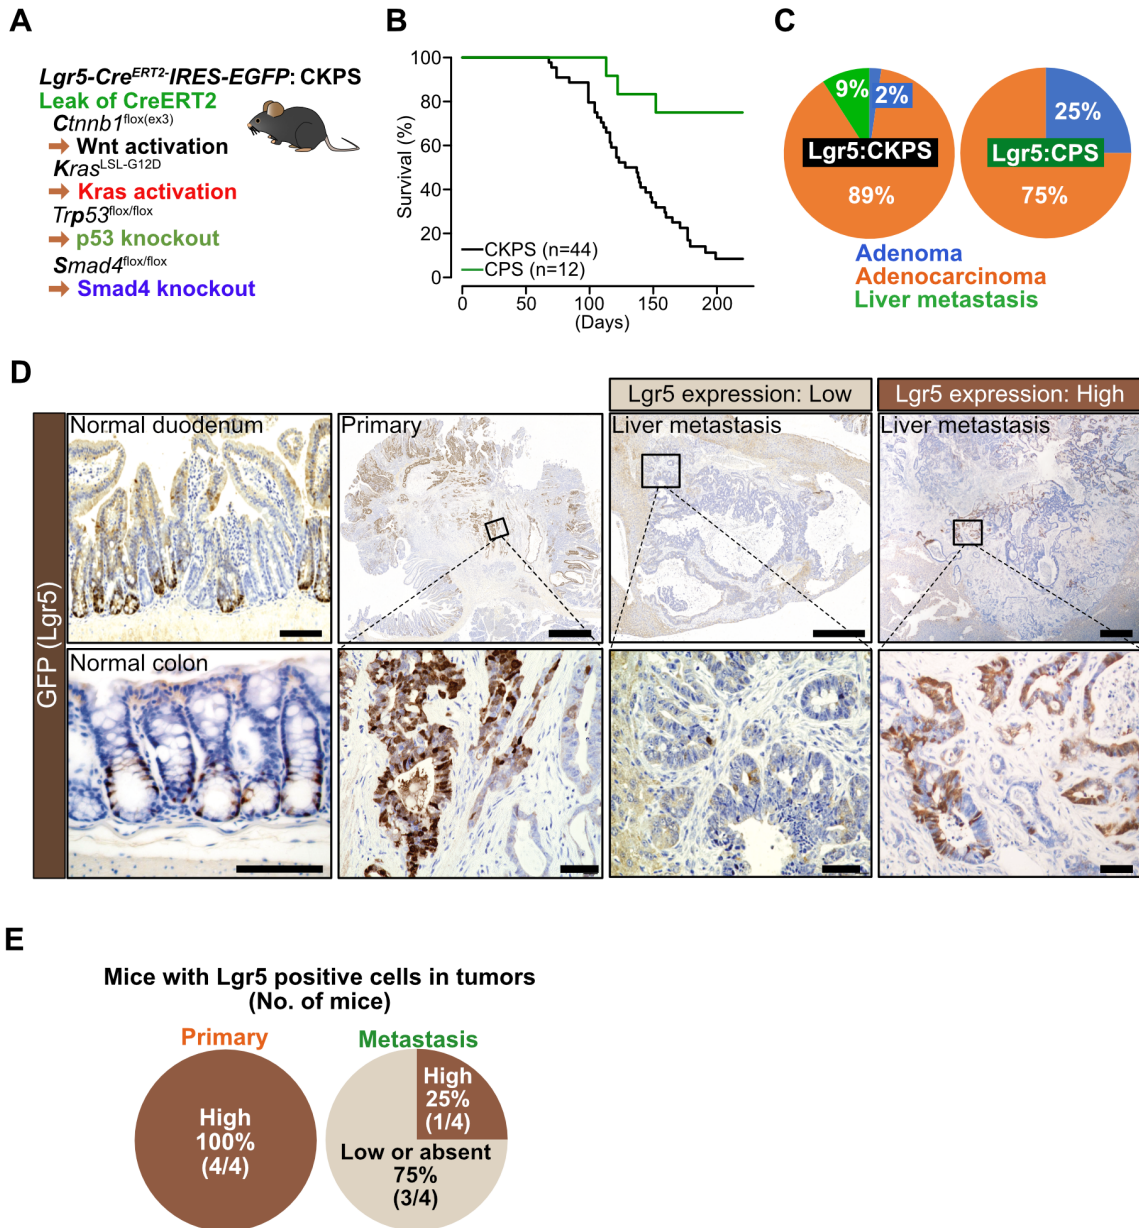

**Supplementary Figure S6. Spontaneous activation of Lgr5-driven CreERT2 also induces intestinal adenocarcinomas that metastasize to the liver in CKPS mice.** (A) Schematic description of another spontaneous metastasis model of intestinal tumors induced by spontaneous activation of Lgr5-CreERT2. (B) Kaplan-Meier survival curves of Lgr5-CreERT2:CKPS mice and Lgr5-CreERT2:CPS mice. (C) Pie chart showing incidence of intestinal tumors in

Lgr5-CreERT2:CKPS and Lgr5-CreERT2:CPS mice, classified based on the most advanced tumors in each mouse (adenoma, locally invasive adenocarcinoma, or liver metastasis). (D) Immunostaining of GFP as a surrogate for Lgr5 expression in representative primary tumors and liver metastases of Lgr5-Cre:CKPS mice. Scale bars: 100  $\mu\text{m}$  for the left-most panels, 500  $\mu\text{m}$  for three panels from the right on top row, and 50  $\mu\text{m}$  for three panels from the right on bottom row. (E) Pie charts for the intensity of GFP (Lgr5) staining in primary tumors and metastases of Lgr5-CreERT2:CKPS mice. High, clearly stained cells in glandular structures. Low or absent, intensity of staining similar to background.
